# Supplementary material
Source: Springer Nature journal article supplement (https://www.springermedizin.de/resource/supplementary/12886_2010_260_MOESM3_ESM.pdf/9473676)

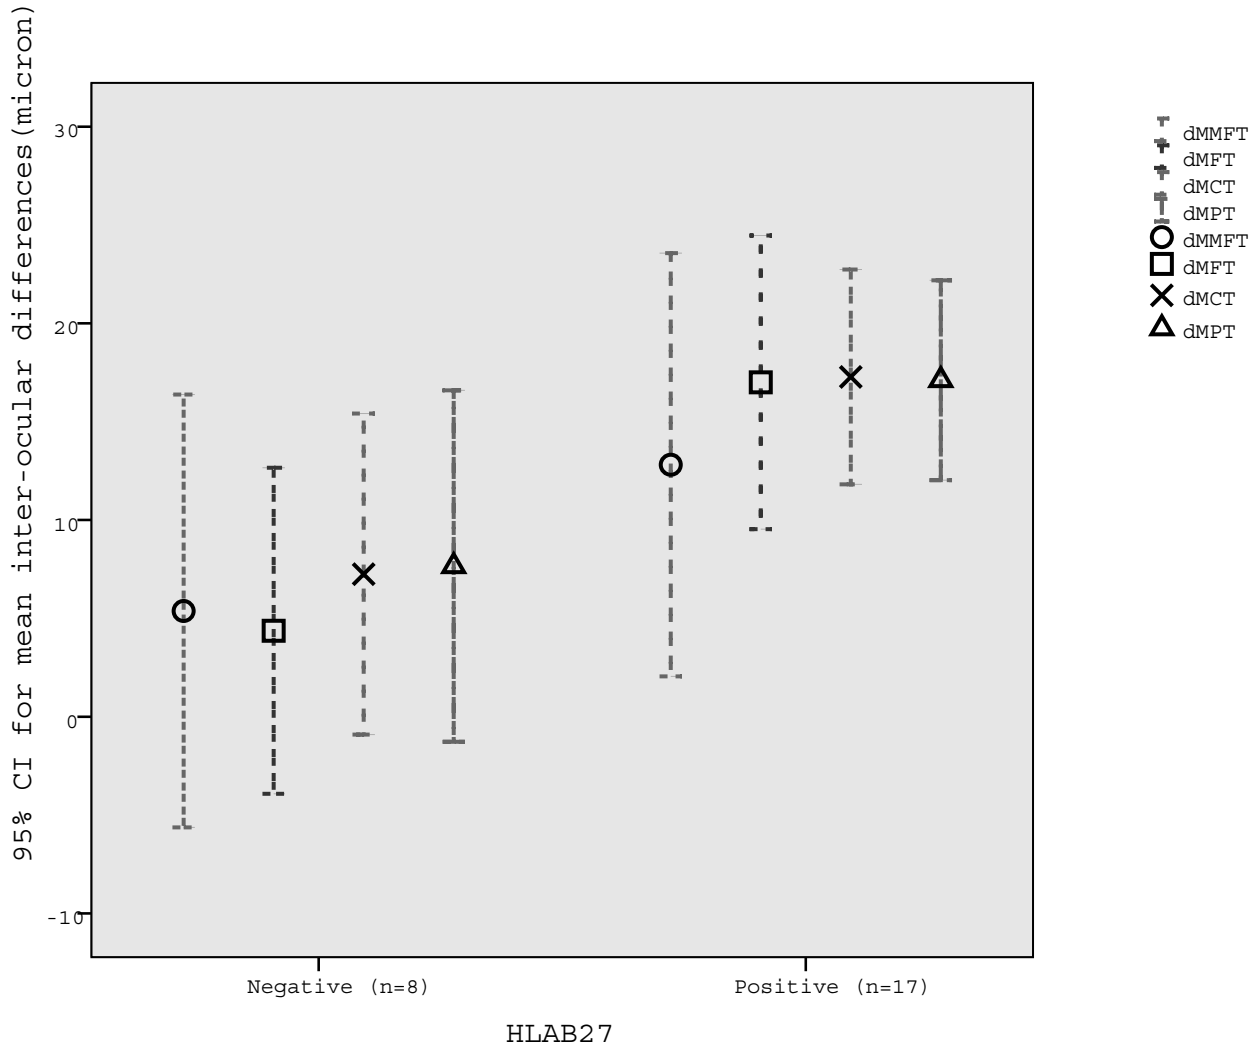

Supplement: MOESM3 [file 9473676]
